# Supplementary material for: Proteomic analysis of chicken embryo fibroblast cells infected with recombinant H5N1 avian influenza viruses with and without NS1 eIF4GI binding domain
Source: PubMed Central journal article supplement (PMC5823584; doi:10.18632/oncotarget.23615), 2017-12-22
Supplement: oncotarget-09-8350-s001.pdf [file oncotarget-09-8350-s001.pdf]

# Proteomic analysis of chicken embryo fibroblast cells infected with recombinant H5N1 avian influenza viruses with and without NS1 eIF4GI binding domain

## SUPPLEMENTARY MATERIALS

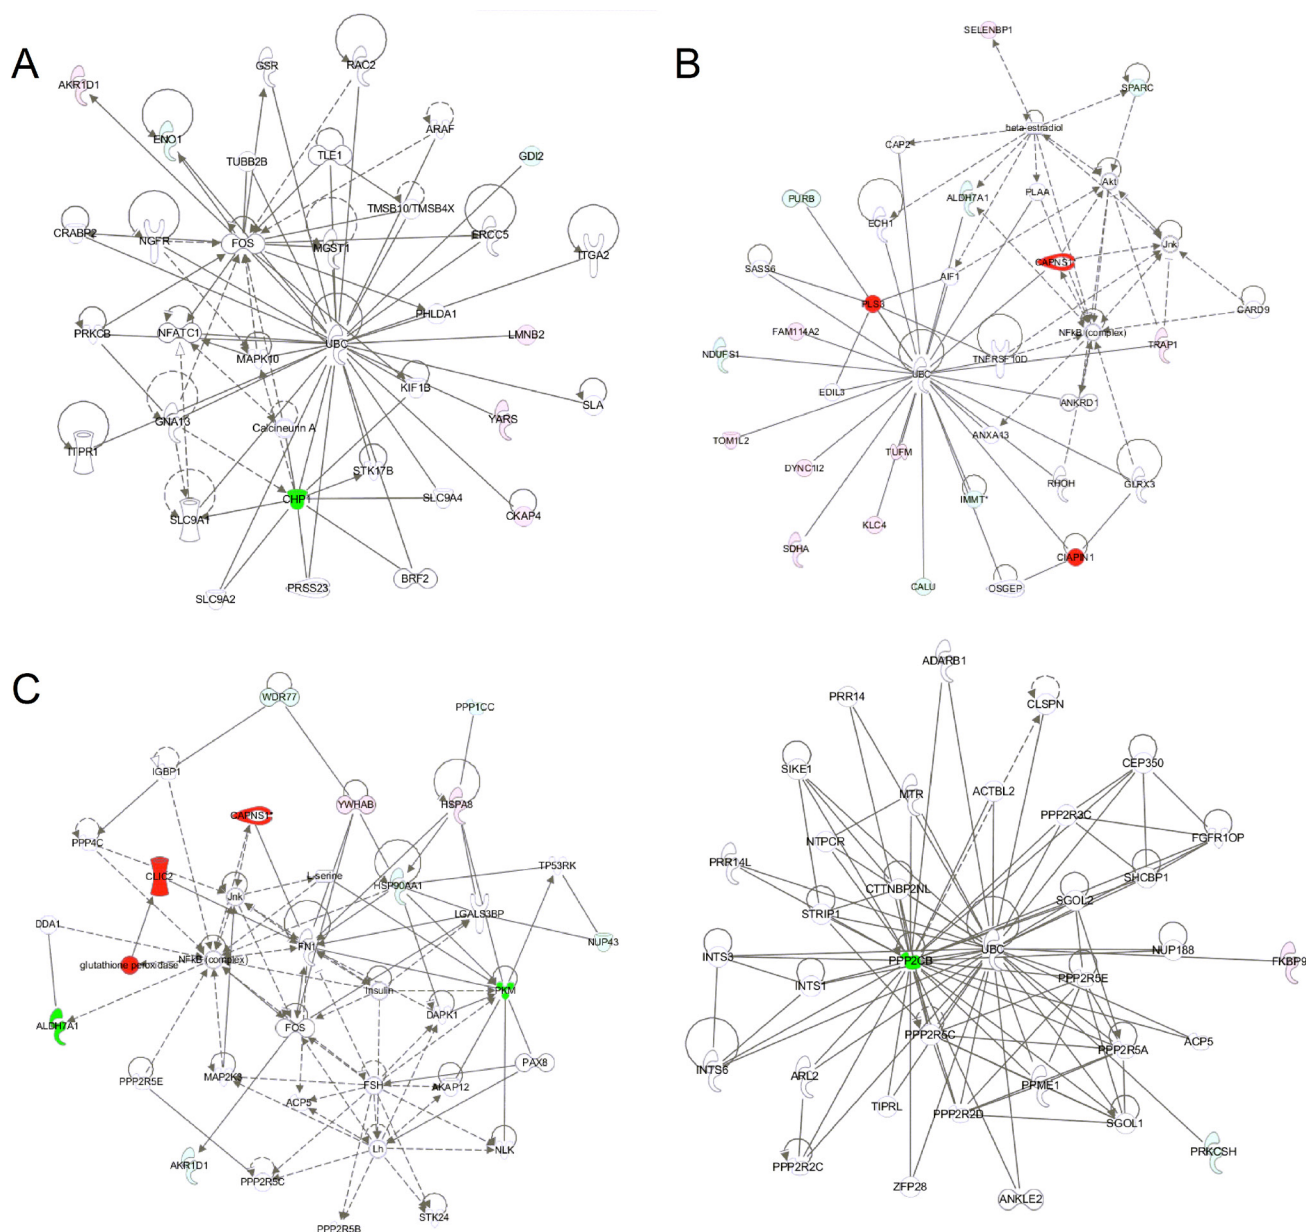

Supplementary Figure 1: Network pathway analysis protein identified by rNS1-wt relative to rNS1-SD30 infection. The other score network at 12 h (A), 24 h (B) and 36 h (C).

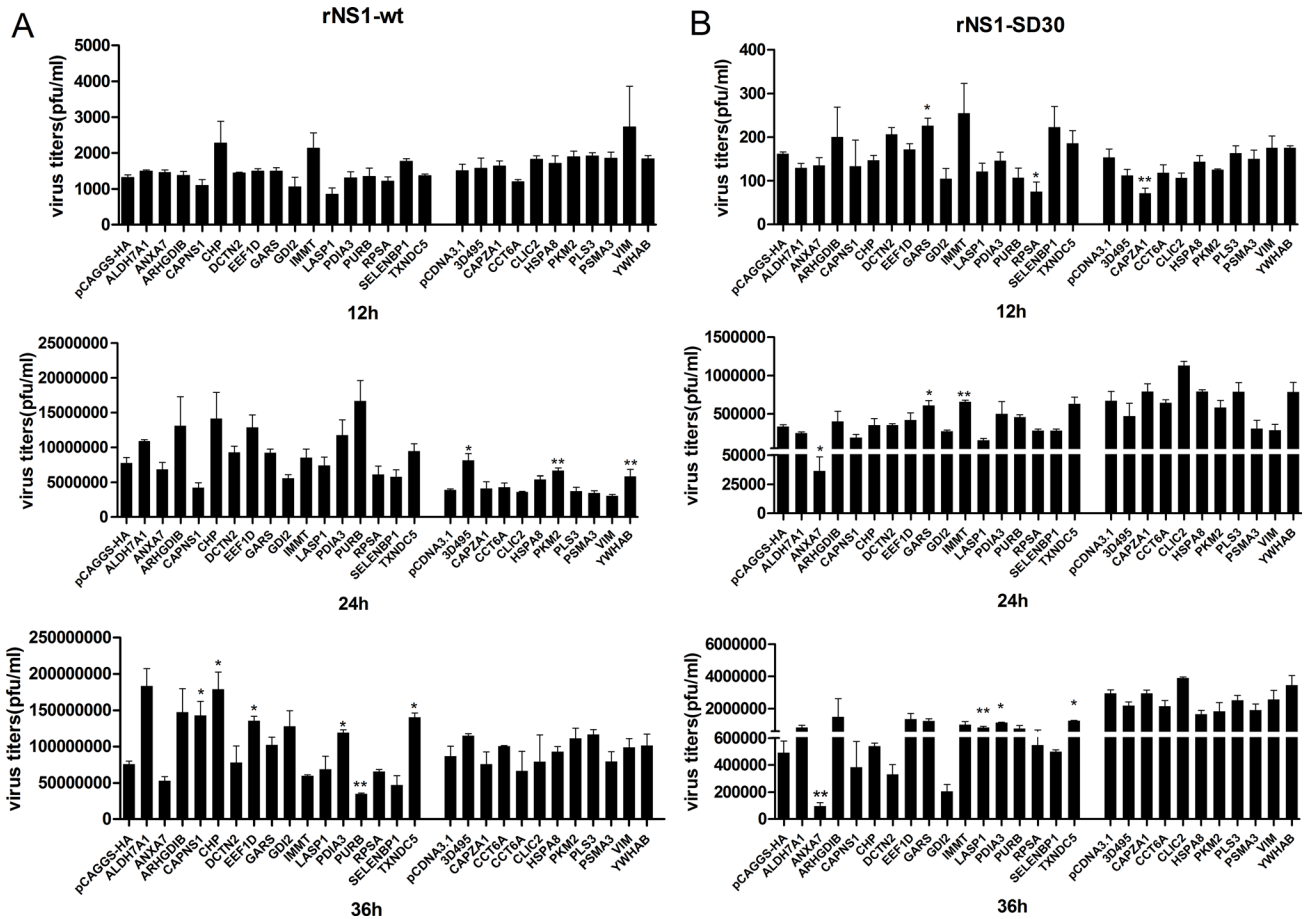

**Supplementary Figure 2: The effect of overexpression DE proteins on rNS1-wt and rNS1-SD30 viruses replication.** DF1 cells seeded in 12-well plate were transfected with 1 $\mu$ g control plasmid pCAGGS-HA or pCDNA3.1-V5 or indicated plasmids for 24 h, and infected with rNS1-wt (A) and rNS1-SD30 (B) virus at 0.01 MOI. Supernatant were collected at 12, 24, and 36 hpi, and assessed for viral titers using plaque assays on MDCK cells.

**Supplementary Table 1: The detailed functions of up-regulation and down-regulation proteins infected with each virus at each time point. See\_Supplementary\_Table 1**

**Supplementary Table 2: Primer sequences used for plasmids construction and qRT-PCR. See\_Supplementary\_Table 2**

**Supplementary Table 3: Pairwise comparison of differentially expressed proteins in CEF at 24 hours post-inoculation with the H5N1 viruses rNS1-wt or rNS1-SD30. See\_Supplementary\_Table 3**

**Supplementary Table 4: 3 Pairwise comparison of differentially expressed proteins in CEF at 36 hours post-inoculation with the H5N1 viruses rNS1-wt or rNS1-SD30. See\_Supplementary\_Table 4**
